# Supplementary material
Source: Royal Society of Chemistry journal article supplement (doi:10.1039/d6cc02443b)
Supplement: d6cc02443b1.pdf [file d6cc02443b1.pdf]

## **Supporting information**

**Low-Cost Ni/BaCO<sub>3</sub> Composite Electrodes via Phase Transformation  
for Highly Efficient Alkaline Hydrogen Evolution**

## Experimental section

### *1. Synthesis of Ba/NPN@x and Pt/C Electrode*

Commercial Nickel Oxide (NiO, 99%) and Barium Carbonate (BaCO<sub>3</sub>, 99%) were purchased from Aladdin Reagent Co., Ltd. (Shanghai, China). Commercial 20 wt% Pt/C supported on Vulcan XC-72R carbon black was purchased from Premetek Co., Ltd. and used as received.

In a typical procedure, NiO and BaCO<sub>3</sub> were physically mixed in a mass ratio of 20:1. To ensure homogeneous mixing, the mixture was thoroughly ground in an agate mortar for 1.5 h. The resulting powder was then compacted into a pellet with a mass of approximately 0.25 g and a diameter of 13 mm under a uniaxial pressure of 68 MPa.

The as-prepared sample was subjected to high-temperature sintering in a muffle furnace at 1000 °C for 2 h in the air. After natural cooling to room temperature, the sintered sample was transferred to a tube furnace and reduced in a hydrogen (H<sub>2</sub>) atmosphere for 30 min at various temperatures ranging from 300 to 600 °C. Finally, the reduced sample was allowed to cool naturally to room temperature, yielding the target Ba/NPN@x electrode.

Commercial 20 wt% Pt/C was used as the benchmark catalyst for HER comparison. Typically, 5 mg of 20 wt% Pt/C catalyst was dispersed in a mixed solvent containing 250 μL of deionized water, 700 μL of

ethanol, and 50  $\mu\text{L}$  of 5 wt% Nafion solution. The mixture was ultrasonicated for 30–60 min to obtain a homogeneous catalyst ink. Before use, the ink was further shaken or briefly sonicated to ensure uniform dispersion.

Carbon paper was used as the substrate for Pt/C loading. Prior to catalyst coating, the carbon paper was rinsed with ethanol and deionized water, followed by drying at room temperature or at 60  $^{\circ}\text{C}$ . The exposed geometric area was controlled to be 0.25  $\text{cm}^2$ . The Pt/C ink was drop-cast onto the defined area of the carbon paper. To ensure uniform coating and avoid ink overflow, the total ink volume of 25  $\mu\text{L}$  was deposited in several steps, with 5  $\mu\text{L}$  added each time. The electrode was dried after each deposition before the next aliquot was added.

Based on the ink concentration of 5  $\text{mg mL}^{-1}$ , the total Pt/C loading on the carbon paper was 0.125 mg, corresponding to a Pt/C loading of 0.5  $\text{mg cm}^{-2}$ . Since the commercial Pt/C catalyst contained 20 wt% Pt, the actual Pt loading was 0.025 mg on the 0.25  $\text{cm}^2$  electrode, corresponding to a loading of 0.1  $\text{mg Pt cm}^{-2}$ . The obtained Pt/C-coated carbon paper was used as the benchmark electrode for HER measurements under the same electrochemical testing conditions as the Ba/NPN electrodes.

## ***2. Characterization***

The sample phases were identified via an X-ray diffractometer (XRD, Bruker D2 PHASER, Germany) with Cu K $\alpha$  radiation and a Raman spectrometer (Thermo Fischer DXR, China). The microstructure and elemental mapping of monoliths were analyzed using a transmission electron microscopy (TEM, JEOL JEM 2100F, Japan) and a scanning electron microscope (SEM, FlexSEM 1000II, Japan) equipped with energy-dispersive X-ray spectroscopy (EDS). The particle of the samples were also measured from the SEM images by Nano Measurer Software.

### ***3. Electrochemical measurements***

All electrochemical measurements were conducted in 1 M KOH using a conventional three-electrode configuration on a CHI660E electrochemical workstation. The as-prepared Ba/NPN electrode was directly used as the working electrode with an exposed geometric area of 1 x 1cm<sup>2</sup>. A carbon rod and an Hg/HgO electrode were used as the counter and reference electrodes, respectively. In all measurements, the Hg/HgO electrode underwent calibration to align with the reversible hydrogen electrode (RHE) with the Nernst equation:  $E_{RHE} = E_{Hg/HgO} + 0.059 \times pH + 0.098$  (in 1 M KOH). Before HER measurements, the electrodes were activated via 60 cycles of cyclic voltammetry (CV) between -0.8 V and -1.6 V at a scan rate of 5 mV/s. Linear sweep voltammetry (LSV) curves were recorded at a scanning rate of 1 mV/s and all the polarization curves were 95% iR-corrected. Electrochemical impedance spectroscopy (EIS)

experiments were conducted at a frequency range of  $10^{-2}$  Hz– $10^5$  Hz, maintaining a potential of -0.3 V vs RHE with an amplitude of 5 mV. To obtain the electrochemically active surface area (ECSA), CV curves were tested within the potential window of 0.3–0.4 V at various scan rates, allowing for the estimation of the double-layer capacitance ( $C_{dl}$ ). The ECSA was calculated based on the formula :  $ECSA = C_{dl}/C_s$ , the capacitance per unit area ( $C_s$ ) is generally assumed to be  $0.04 \text{ mF cm}^{-2}$ .<sup>1</sup>

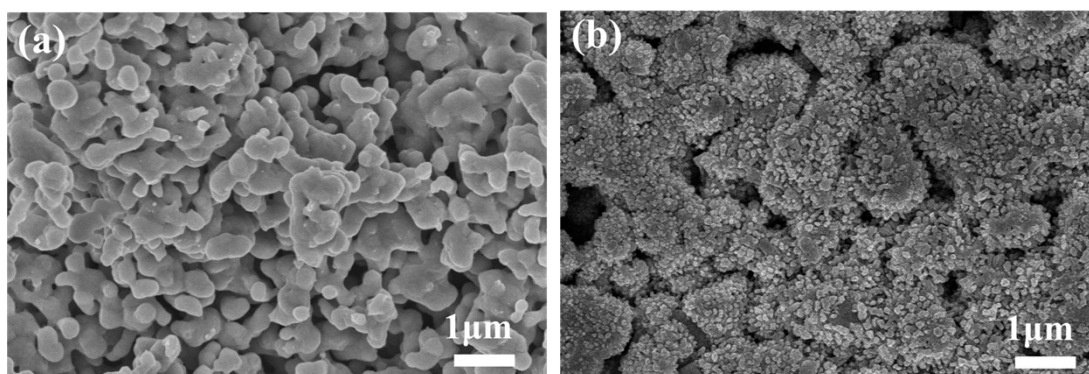

**Figure S1.** SEM images of (a) NiO reduced at 400 °C and (b) Ba/NPN@400.

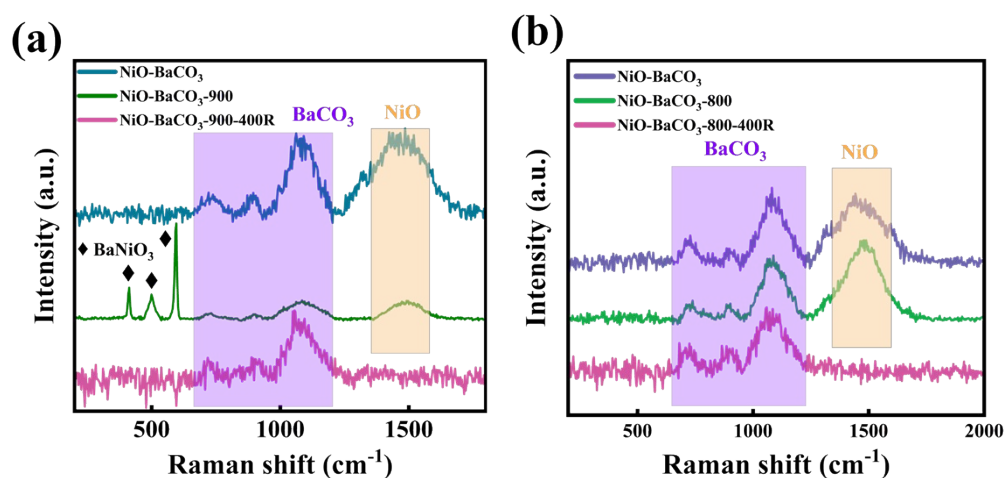

**Figure S2.** Raman spectra of the samples sintered at 900 °C and 800 °C.

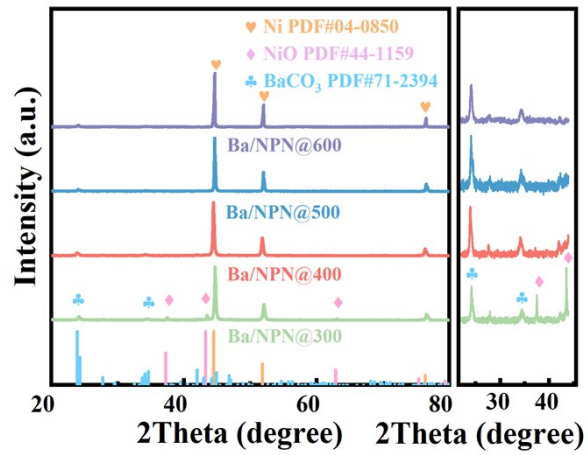

**Figure S3.** XRD patterns of Ba/NPN@ $x$  ( $x = 300, 400, 500, 600$ ).

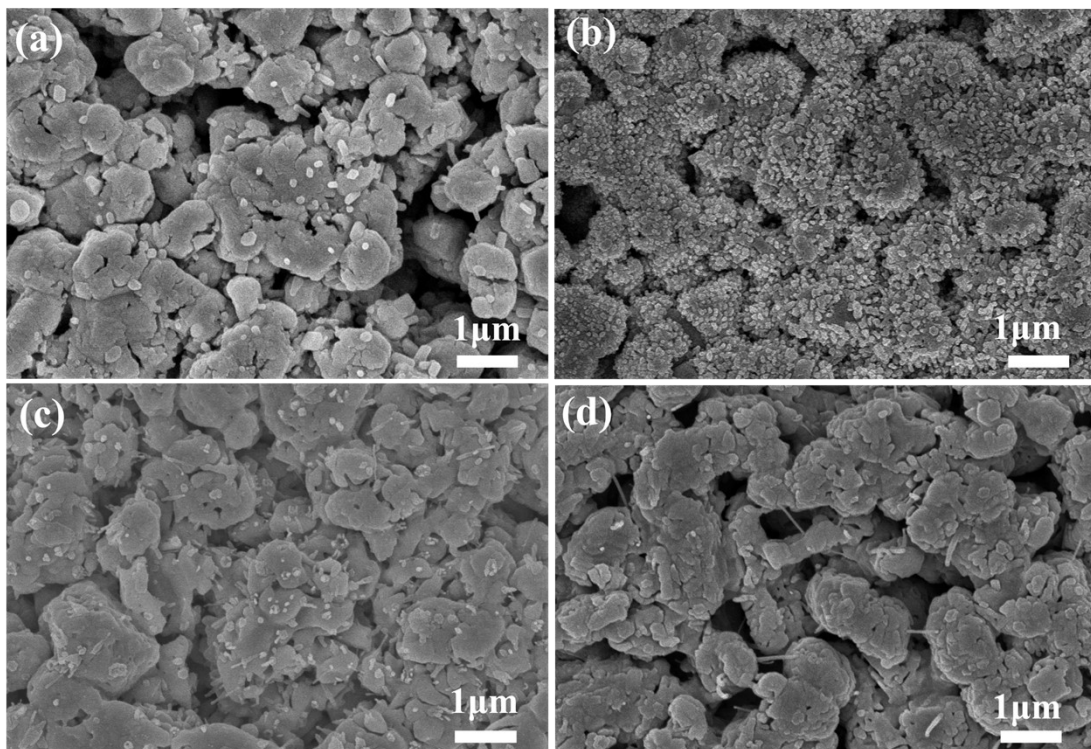

**Figure S4.** SEM images of samples at different reduction temperatures: (a) 300 °C, (b) 400 °C, (c) 500 °C, (d) 600 °C.

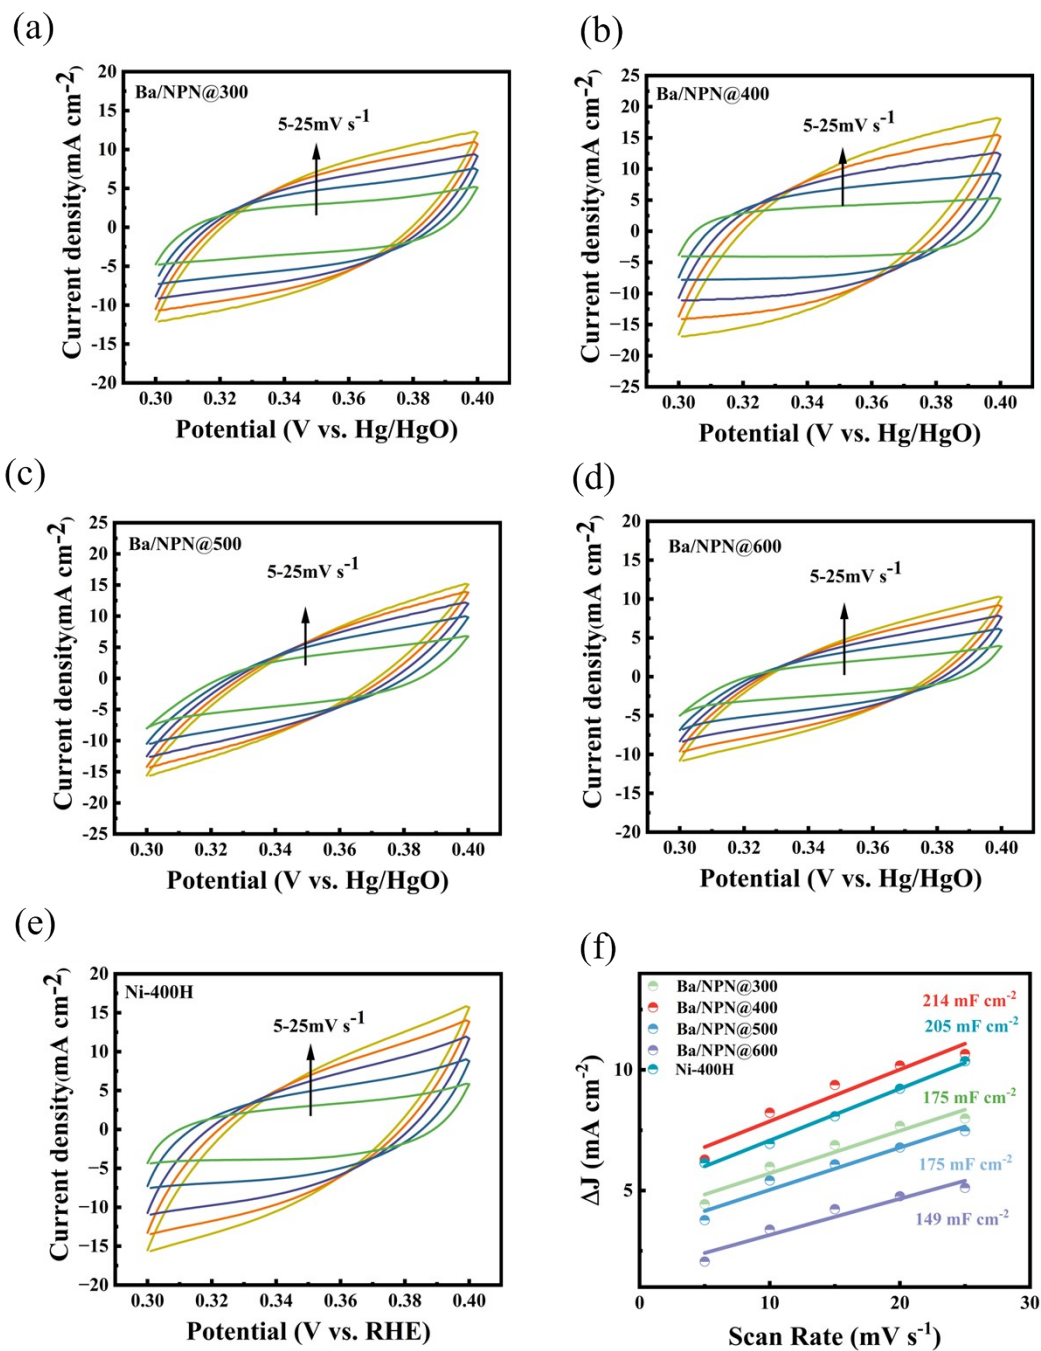

**Figure S5.** Different current densities versus scan rates for (a) Ba/NPN@300, (b) Ba/NPN@400, (c) Ba/NPN@500, (d) Ba/NPN@600, and (e) Ni-400H. (f)  $C_{dl}$  of the Electrodes reduced at different temperatures.

Tabel S1. Comparison of HER performances for Ba/NPN@400 electrode and other electrodes in 1 M KOH at 10 mA cm<sup>-2</sup>.

| Electrodes                                            | $\eta_{10}$ (mV) | References                                                                      |
|-------------------------------------------------------|------------------|---------------------------------------------------------------------------------|
| Ba/NPN@400                                            | 36               | This work                                                                       |
| NiS–CeO <sub>2</sub>                                  | 47               | <i>Langmuir</i> , 2023, <b>39</b> , 17929-17938                                 |
| NiCo <sub>2</sub> O <sub>4</sub> /Ni(OH) <sub>2</sub> | 84               | <i>International Journal of Hydrogen Energy</i> , 2021, <b>46</b> , 32846-32857 |
| Ni/Co <sub>3</sub> O <sub>4</sub>                     | 90               | <i>Nano-Micro Letters</i> , 2022, <b>14</b> , 148                               |
| Ni/CeO <sub>2</sub>                                   | 100              | <i>Small</i> , 2022, <b>18</b> , 2106592                                        |
| CeNiFe-MOF                                            | 113              | <i>Chemical Science</i> , 2025, <b>16</b> , 685-692.                            |
| 4 wt% Ni–Co <sub>3</sub> O <sub>4</sub>               | 120              | <i>Journal of Alloys and Compounds</i> , 2020, <b>823</b> , 153750              |
| Sm@NiCu                                               | 125              | <i>Acs Applied Energy Materials</i> , 2023, <b>6</b> , 8818-8829                |

## References

1. R. Martínez-Hincapié, J. Wegner, M. U. Anwar, A. Raza-Khan, S. Franzka, S. Kleszczynski and V. Čolić, *Electrochimica Acta*, 2024, **476**, 143663.
